# Supplementary material for: The undiscovered biosynthetic potential of the Greenland Ice Sheet microbiome
Source: Front Microbiol. 2023 Dec 12;14:1285791. doi: 10.3389/fmicb.2023.1285791 (PMC10749974; doi:10.3389/fmicb.2023.1285791)
Supplement: Supplementary file 1 [file Table_1.XLSX]

## Sheet: isolates
Bacterial Isolates
ID	Inoculum	Closest relative, WGS extracted 16S rRNA	% Pairwise Identity2	Accession3	TYGS close relative	Genome size	GC content	number of genes	plasmids	rRNA operons	tRNA genes	# Nucleotide Sequences	Column1
10B4	biofilm	Sphingomonas glacialis strain C16y 16S ribosomal RNA, partial sequence	0.998	NR_117270		4202780	0.657	3961	4	3	53	5
10C2	cryoconite	Leifsonia kafniensis strain KFC-22 16S ribosomal RNA, partial sequence	0.988	NR_042669	Cryobacterium glucosi sp. nov.	4217013	0.674	3886	1	3	49	2
10C3	cryoconite	Pseudomonas frederiksbergensis strain DSM 13022 16S ribosomal RNA, partial sequence	0.987	NR_117177	Cryobacterium glucosi sp. nov.	4216393	0.673	4220	1	3	48	2
10S4	snow	Pseudomonas frederiksbergensis strain DSM 13022 16S ribosomal RNA, partial sequence	0.998	NR_117177		7270762	0.589	7102	0	6	67	1
5B3	biofilm	Cryobacterium tepidiphilum strain NEAU-85 16S ribosomal RNA, partial sequence	0.986	NR_164984		4337804	0.673	3765	1	3	52	2
5C2	cryoconite	Pseudomonas frederiksbergensis strain DSM 13022 16S ribosomal RNA, partial sequence	0.988	NR_117177		5389896	0.575	4968	0	6	67	3
5C4	cryoconite	Mucilaginibacter rigui strain NBRC 101115 16S ribosomal RNA, partial sequence	0.988	NR_113976		4406391	0.43	4092	0	2	43	1
5I1	ice	Herbaspirillum lusitanum strain P6-12 16S ribosomal RNA, partial sequence	0.965	NR_028859		4880066	0.469	4252	1	4	52	2
AB6	cryoconite	Pseudomonas silesiensis strain A3 16S ribosomal RNA, complete sequence	0.989	NR_156815		5059091	0.55	4701	1	6	65	2
AH2	cryoconite	Pseudomonas frederiksbergensis strain DSM 13022 16S ribosomal RNA, partial sequence	0.987	NR_117177		5508962	0.564	4989	0	6	66	1
Bout1	ice	Pseudomonas migulae strain CIP 105470 16S ribosomal RNA, partial sequence	0.994	NR_024927		7306465	0.602	6703	3	6	70	4
CA11.2	cryoconite	Glaciimonas alpina strain Cr9-12 16S ribosomal RNA, partial sequence	0.999	NR_135902		5502355	0.496	4851	1	4	57	2
CCC2.4	cryoconite	Actimicrobium antarcticum strain KOPRI 25157 16S ribosomal RNA, partial sequence	0.982	NR_118029		4150713	0.592	3693	0	6	58	1
CCC3.1	cryoconite	Pseudomonas versuta strain L10.10 16S ribosomal RNA, partial sequence	0.997	NR_149823		5869888	0.574	5112	0	7	72	1
CCC3.4	cryoconite	Herbaspirillum lusitanum strain P6-12 16S ribosomal RNA, partial sequence	0.963	NR_028859		4586698	0.539	4037	0	5	57	1
CCC4.1	cryoconite	Pseudomonas fragi strain NBRC 3458 16S ribosomal RNA, partial sequence	1	NR_113578	Pseudomonas bubulae	5031983	0.583	4508	1	8	80	2
CCI1.1	ice	Pseudomonas lactis strain DSM 29167 16S ribosomal RNA, partial sequence	1	NR_156986	Pseudomonas paracamis	6765387	0.596	6071	0	6	73	1
CCI2.3	ice	Glaciimonas singularis strain A2-57 16S ribosomal RNA, partial sequence	0.971	NR_109670		4607688	0.575	4119	1	6	58	8
CCI3.1	ice	Pseudomonas weihenstephanensis strain DSM 29166 16S ribosomal RNA, partial sequence	0.997	NR_148764	Pseudomonas psychrophila	5563000	0.572	5088	1	8	70	2
CCI4.2	ice	Pseudomonas silesiensis strain A3 16S ribosomal RNA, complete sequence	0.987	NR_156815		5565001	0.564	5040	0	6	66	1
DC1.2	cryoconite	Pseudomonas frederiksbergensis strain DSM 13022 16S ribosomal RNA, partial sequence	0.996	NR_117177		5824620	0.581	5251	0	6	69	1
FG1	cryoconite	Pseudomonas veronii strain CIP 104663 16S ribosomal RNA, partial sequence	0.998	NR_028706		6847863	0.608	6182	1	6	67	3
MH10	ice	Pseudomonas silesiensis strain A3 16S ribosomal RNA, complete sequence	0.988	NR_156815		5575862	0.563	5050	0	6	66	1
MH9.2	ice	Pseudomonas frederiksbergensis strain DSM 13022 16S ribosomal RNA, partial sequence	0.988	NR_117177		5584024	0.573	5124	0	6	67	1
MH9.3	ice	Pseudomonas antarctica strain CMS 35 16S ribosomal RNA, partial sequence	0.997	NR_025586		5696094	0.611	4984	0	5	66	1
RTB3	biofilm	Pseudomonas frederiksbergensis strain DSM 13022 16S ribosomal RNA, partial sequence	0.987	NR_117177		5697835	0.601	6275	0	5	66	1
RTI4	ice	Herbaspirillum lusitanum strain P6-12 16S ribosomal RNA, partial sequence	0.979	NR_028859		3986208	0.555	3488	2	4	50	3
10S3	snow	Cryobacterium tepidiphilum strain NEAU-85 16S ribosomal RNA, partial sequence	0.98	NR_164984	Cryobacterium glucosi sp. nov.	4233169	0.673	3893	0	3	49	1

## Sheet: MAGs
MAG ID	Environment	TYGS ID	NCBI Phylum	GTDB	Column2	Column3	Column4	Column5	Column6	Column7
cryoconite2_11	Cryoconite		Acidobacteria	d__Bacteria	p__Acidobacteriota	c__Acidobacteriae	o__Bryobacterales	f__Bryobacteraceae	g__BOG-234	s__
cryoconite2_18	Cryoconite		Acidobacteria	d__Bacteria	p__Acidobacteriota	c__Acidobacteriae	o__Bryobacterales	f__Bryobacteraceae	g__	s__
cryoconite2_2	Cryoconite		Acidobacteria	d__Bacteria	p__Acidobacteriota	c__Acidobacteriae	o__Acidobacteriales	f__Acidobacteriaceae	g__Edaphobacter	s__
cryoconite3_8	Cryoconite		Acidobacteria	d__Bacteria	p__Acidobacteriota	c__Acidobacteriae	o__Bryobacterales	f__Bryobacteraceae	g__BOG-234	s__
cryoconite1_33	Cryoconite		Acidobacteria	d__Bacteria	p__Acidobacteriota	c__Acidobacteriae	o__Acidobacteriales	f__Acidobacteriaceae	g__Granulicella_C	s__
cryoconite1_6	Cryoconite		Acidobacteria	d__Bacteria	p__Acidobacteriota	c__Acidobacteriae	o__Bryobacterales	f__Bryobacteraceae	g__BOG-234	s__
filter2_3	Ice		Acidobacteria	d__Bacteria	p__Acidobacteriota	c__Acidobacteriae	o__Acidobacteriales	f__Acidobacteriaceae	g__Granulicella_C	s__
filter1_5	Ice		Acidobacteria	d__Bacteria	p__Acidobacteriota	c__Acidobacteriae	o__Acidobacteriales	f__Acidobacteriaceae	g__Granulicella_C	s__
filter1_7	Ice		Acidobacteria	d__Bacteria	p__Acidobacteriota	c__Acidobacteriae	o__Acidobacteriales	f__Acidobacteriaceae	g__Granulicella_C	s__
filter3_1	Ice		Acidobacteria	d__Bacteria	p__Acidobacteriota	c__Acidobacteriae	o__Acidobacteriales	f__Acidobacteriaceae	g__Granulicella_C	s__
filter3_5	Ice		Acidobacteria	d__Bacteria	p__Acidobacteriota	c__Acidobacteriae	o__Acidobacteriales	f__Acidobacteriaceae	g__Granulicella_C	s__
cryoconite2_12	Cryoconite		Actinobacteria	d__Bacteria	p__Actinobacteriota	c__Acidimicrobiia	o__Acidimicrobiales	f__RAAP-2	g__Bog-756	s__
cryoconite2_14	Cryoconite		Actinobacteria	d__Bacteria	p__Actinobacteriota	c__Actinomycetia	o__Nanopelagicales	f__Nanopelagicaceae	g__PALSA-747	s__
cryoconite2_22	Cryoconite		Actinobacteria	d__Bacteria	p__Actinobacteriota	c__Actinomycetia	o__Actinomycetales	f__Dermatophilaceae	g__UBA4719	s__
cryoconite2_4	Cryoconite		Actinobacteria	d__Bacteria	p__Actinobacteriota	c__Actinomycetia	o__Actinomycetales	f__Microbacteriaceae	g__Lacisediminihabitans	s__
cryoconite3_17	Cryoconite		Actinobacteria	d__Bacteria	p__Actinobacteriota	c__Actinomycetia	o__Actinomycetales	f__Dermatophilaceae	g__UBA4719	s__
cryoconite3_18	Cryoconite		Actinobacteria	d__Bacteria	p__Actinobacteriota	c__Acidimicrobiia	o__Acidimicrobiales	f__RAAP-2	g__Bog-756	s__
cryoconite3_24	Cryoconite		Actinobacteria	d__Bacteria	p__Actinobacteriota	c__Actinomycetia	o__Nanopelagicales	f__Nanopelagicaceae	g__PALSA-747	s__
cryoconite3_3	Cryoconite		Actinobacteria	d__Bacteria	p__Actinobacteriota	c__Actinomycetia	o__Actinomycetales	f__Microbacteriaceae	g__Lacisediminihabitans	s__
cryoconite1_20	Cryoconite		Actinobacteria	d__Bacteria	p__Actinobacteriota	c__Acidimicrobiia	o__Acidimicrobiales	f__RAAP-2	g__Bog-756	s__
cryoconite1_3	Cryoconite		Actinobacteria	d__Bacteria	p__Actinobacteriota	c__Actinomycetia	o__Nanopelagicales	f__Nanopelagicaceae	g__PALSA-747	s__
cryoconite1_31	Cryoconite		Actinobacteria	d__Bacteria	p__Actinobacteriota	c__Actinomycetia	o__Actinomycetales	f__Microbacteriaceae	g__Lacisediminihabitans	s__
cryoconite1_7	Cryoconite		Actinobacteria	d__Bacteria	p__Actinobacteriota	c__Actinomycetia	o__Actinomycetales	f__Dermatophilaceae	g__UBA4719	s__
cryoconite2_3	Cryoconite		Armatimonadetes	d__Bacteria	p__Armatimonadota	c__Armatimonadia	o__Armatimonadales	f__Capsulimonadaceae	g__JAFAZD01	s__
cryoconite3_23	Cryoconite		Armatimonadetes	d__Bacteria	p__Armatimonadota	c__Chthonomonadetes	o__Chthonomonadales	f__Chthonomonadaceae	g__	s__
cryoconite1_14	Cryoconite		Armatimonadetes	d__Bacteria	p__Armatimonadota	c__Armatimonadia	o__Armatimonadales	f__Armatimonadaceae	g__	s__
cryoconite1_21	Cryoconite		Armatimonadetes	d__Bacteria	p__Armatimonadota	c__Armatimonadia	o__Armatimonadales	f__Capsulimonadaceae	g__	s__
cryoconite1_5	Cryoconite		Armatimonadetes	d__Bacteria	p__Armatimonadota	c__Chthonomonadetes	o__Chthonomonadales	f__Chthonomonadaceae	g__	s__
filter2_2	Ice		Armatimonadetes	d__Bacteria	p__Armatimonadota	c__Armatimonadia	o__Armatimonadales	f__Capsulimonadaceae	g__JAFAZD01	s__
filter1_4	Ice		Armatimonadetes	d__Bacteria	p__Armatimonadota	c__Armatimonadia	o__Armatimonadales	f__Capsulimonadaceae	g__	s__
filter3_3	Ice		Armatimonadetes	d__Bacteria	p__Armatimonadota	c__Armatimonadia	o__Armatimonadales	f__Capsulimonadaceae	g__	s__
cryoconite2_5	Cryoconite		Bacteroidetes	d__Bacteria	p__Bacteroidota	c__Bacteroidia	o__Chitinophagales	f__Saprospiraceae	g__JAAFJT01	s__
cryoconite2_7	Cryoconite		Bacteroidetes	d__Bacteria	p__Bacteroidota	c__Bacteroidia	o__Sphingobacteriales	f__CAIKLP01	g__	s__
cryoconite2_9	Cryoconite		Bacteroidetes	d__Bacteria	p__Bacteroidota	c__Bacteroidia	o__Chitinophagales	f__Chitinophagaceae	g__Ferruginibacter	s__Ferruginibacter sp014377975
cryoconite3_12	Cryoconite		Bacteroidetes	d__Bacteria	p__Bacteroidota	c__Bacteroidia	o__Chitinophagales	f__Saprospiraceae	g__JAAFJT01	s__
cryoconite3_13	Cryoconite		Bacteroidetes	d__Bacteria	p__Bacteroidota	c__Bacteroidia	o__Chitinophagales	f__Chitinophagaceae	g__Ferruginibacter	s__Ferruginibacter sp014377975
cryoconite3_14	Cryoconite		Bacteroidetes	d__Bacteria	p__Bacteroidota	c__Bacteroidia	o__Bacteroidales	f__Paludibacteraceae	g__Paludibacter	s__
cryoconite3_22	Cryoconite		Bacteroidetes	d__Bacteria	p__Bacteroidota	c__Bacteroidia	o__Sphingobacteriales	f__CAIKLP01	g__	s__
cryoconite1_1	Cryoconite		Bacteroidetes	d__Bacteria	p__Bacteroidota	c__Bacteroidia	o__Chitinophagales	f__Chitinophagaceae	g__Ferruginibacter	s__Ferruginibacter sp014377975
cryoconite1_28	Cryoconite		Bacteroidetes	d__Bacteria	p__Bacteroidota	c__Bacteroidia	o__Sphingobacteriales	f__	g__	s__
cryoconite1_9	Cryoconite		Bacteroidetes	d__Bacteria	p__Bacteroidota	c__Bacteroidia	o__Chitinophagales	f__Saprospiraceae	g__JAAFJT01	s__
filter2_4	Ice		Bacteroidetes	d__Bacteria	p__Bacteroidota	c__Bacteroidia	o__Sphingobacteriales	f__	g__	s__
filter2_5	Ice		Bacteroidetes	d__Bacteria	p__Bacteroidota	c__Bacteroidia	o__Cytophagales	f__Hymenobacteraceae	g__Hymenobacter	s__
filter2_8	Ice		Bacteroidetes	d__Bacteria	p__Bacteroidota	c__Bacteroidia	o__Cytophagales	f__Hymenobacteraceae	g__Hymenobacter	s__
filter1_1	Ice		Bacteroidetes	d__Bacteria	p__Bacteroidota	c__Bacteroidia	o__Sphingobacteriales	f__	g__	s__
filter1_11	Ice		Bacteroidetes	d__Bacteria	p__Bacteroidota	c__Bacteroidia	o__Cytophagales	f__Hymenobacteraceae	g__Hymenobacter	s__
filter1_2	Ice		Bacteroidetes	d__Bacteria	p__Bacteroidota	c__Bacteroidia	o__Cytophagales	f__Hymenobacteraceae	g__Hymenobacter	s__
filter1_6	Ice		Bacteroidetes	d__Bacteria	p__Bacteroidota	c__Bacteroidia	o__Sphingobacteriales	f__	g__	s__
filter3_10	Ice		Bacteroidetes	d__Bacteria	p__Bacteroidota	c__Bacteroidia	o__Cytophagales	f__Hymenobacteraceae	g__Hymenobacter	s__
filter3_11	Ice		Bacteroidetes	d__Bacteria	p__Bacteroidota	c__Bacteroidia	o__Cytophagales	f__Hymenobacteraceae	g__Hymenobacter	s__
filter3_6	Ice		Bacteroidetes	d__Bacteria	p__Bacteroidota	c__Bacteroidia	o__Sphingobacteriales	f__	g__	s__
filter3_8	Ice		Bacteroidetes	d__Bacteria	p__Bacteroidota	c__Bacteroidia	o__Sphingobacteriales	f__Sphingobacteriaceae	g__	s__
biofilm2_10	Ice		Bacteroidetes	d__Bacteria	p__Bacteroidota	c__Bacteroidia	o__Cytophagales	f__Hymenobacteraceae	g__Hymenobacter	s__
biofilm2_11	Ice		Bacteroidetes	d__Bacteria	p__Bacteroidota	c__Bacteroidia	o__Chitinophagales	f__Chitinophagaceae	g__Sediminibacterium	s__
biofilm2_5	Ice		Bacteroidetes	d__Bacteria	p__Bacteroidota	c__Bacteroidia	o__Cytophagales	f__Spirosomaceae	g__Arcicella	s__
biofilm2_6	Ice		Bacteroidetes	d__Bacteria	p__Bacteroidota	c__Bacteroidia	o__Chitinophagales	f__Chitinophagaceae	g__JAAFHG01	s__
biofilm2_9	Ice		Bacteroidetes	d__Bacteria	p__Bacteroidota	c__Bacteroidia	o__Chitinophagales	f__Chitinophagaceae	g__Ferruginibacter	s__Ferruginibacter sp014377975
cryoconite2_6	Cryoconite		Cyanobacteria	d__Bacteria	p__Cyanobacteria	c__Cyanobacteriia	o__Leptolyngbyales	f__Leptolyngbyaceae	g__Phormidesmis_A	s__Phormidesmis_A priestleyi_B
cryoconite3_15	Cryoconite		Cyanobacteria	d__Bacteria	p__Cyanobacteria	c__Cyanobacteriia	o__Leptolyngbyales	f__Leptolyngbyaceae	g__Phormidesmis_A	s__Phormidesmis_A priestleyi_B
cryoconite1_15	Cryoconite		Cyanobacteria	d__Bacteria	p__Cyanobacteria	c__Cyanobacteriia	o__Pseudanabaenales	f__Pseudanabaenaceae	g__Pseudanabaena	s__
cryoconite1_32	Cryoconite		Cyanobacteria	d__Bacteria	p__Cyanobacteria	c__Cyanobacteriia	o__Leptolyngbyales	f__Leptolyngbyaceae	g__Phormidesmis_A	s__Phormidesmis_A priestleyi_B
cryoconite2_17	Cryoconite		Ca. Eremiobacterota	d__Bacteria	p__Eremiobacterota	c__Eremiobacteria	o__Baltobacterales	f__Baltobacteraceae	g__Palsa-1515	s__
cryoconite3_10	Cryoconite		Ca. Eremiobacterota	d__Bacteria	p__Eremiobacterota	c__Eremiobacteria	o__Baltobacterales	f__Baltobacteraceae	g__Palsa-1515	s__
cryoconite1_30	Cryoconite		Ca. Eremiobacterota	d__Bacteria	p__Eremiobacterota	c__Eremiobacteria	o__Baltobacterales	f__Baltobacteraceae	g__Palsa-1515	s__
cryoconite2_19	Cryoconite		Gemmatimonadetes	d__Bacteria	p__Gemmatimonadota	c__Gemmatimonadetes	o__Gemmatimonadales	f__Gemmatimonadaceae	g__AG11	s__AG11 sp014378185
cryoconite3_6	Cryoconite		Gemmatimonadetes	d__Bacteria	p__Gemmatimonadota	c__Gemmatimonadetes	o__Gemmatimonadales	f__Gemmatimonadaceae	g__AG11	s__AG11 sp014378185
cryoconite1_11	Cryoconite		Gemmatimonadetes	d__Bacteria	p__Gemmatimonadota	c__Gemmatimonadetes	o__Gemmatimonadales	f__Gemmatimonadaceae	g__AG11	s__AG11 sp014378185
cryoconite2_24	Cryoconite		Proteobacteria	d__Bacteria	p__Myxococcota	c__Polyangia	o__Polyangiales	f__Polyangiaceae	g__	s__
cryoconite3_19	Cryoconite		Proteobacteria	d__Bacteria	p__Myxococcota	c__Polyangia	o__Polyangiales	f__Polyangiaceae	g__	s__
cryoconite1_19	Cryoconite		Proteobacteria	d__Bacteria	p__Myxococcota	c__Polyangia	o__Polyangiales	f__Polyangiaceae	g__	s__
cryoconite1_8	Cryoconite		Proteobacteria	d__Bacteria	p__Myxococcota	c__Polyangia	o__Haliangiales	f__Haliangiaceae	g__JABFXX01	s__
cryoconite2_10	Cryoconite		Proteobacteria	d__Bacteria	p__Proteobacteria	c__Alphaproteobacteria	o__Sphingomonadales	f__Sphingomonadaceae	g__Novosphingobium	s__
cryoconite2_13	Cryoconite		Proteobacteria	d__Bacteria	p__Proteobacteria	c__Gammaproteobacteria	o__Burkholderiales	f__Burkholderiaceae	g__Schlegelella_A	s__
cryoconite2_15	Cryoconite		Proteobacteria	d__Bacteria	p__Proteobacteria	c__Gammaproteobacteria	o__Xanthomonadales	f__Rhodanobacteraceae	g__Dokdonella_A	s__
cryoconite2_16	Cryoconite		Proteobacteria	d__Bacteria	p__Proteobacteria	c__Gammaproteobacteria	o__Burkholderiales	f__Usitatibacteraceae	g__UKL13-2	s__
cryoconite2_20	Cryoconite		Proteobacteria	d__Bacteria	p__Proteobacteria	c__Gammaproteobacteria	o__Burkholderiales	f__Burkholderiaceae	g__Polaromonas	s__
cryoconite2_21	Cryoconite		Proteobacteria	d__Bacteria	p__Proteobacteria	c__Gammaproteobacteria	o__Burkholderiales	f__Usitatibacteraceae	g__UKL13-2	s__
cryoconite2_23	Cryoconite		Proteobacteria	d__Bacteria	p__Proteobacteria	c__Alphaproteobacteria	o__Caulobacterales	f__Caulobacteraceae	g__Palsa-881	s__
cryoconite2_25	Cryoconite		Proteobacteria	d__Bacteria	p__Proteobacteria	c__Gammaproteobacteria	o__Burkholderiales	f__Burkholderiaceae	g__Ramlibacter	s__
cryoconite2_26	Cryoconite		Proteobacteria	d__Bacteria	p__Proteobacteria	c__Gammaproteobacteria	o__Steroidobacterales	f__Steroidobacteraceae	g__Bog-1198	s__
cryoconite2_27	Cryoconite		Proteobacteria	d__Bacteria	p__Proteobacteria	c__Alphaproteobacteria	o__Sphingomonadales	f__Sphingomonadaceae	g__CAHJWT01	s__
cryoconite2_28	Cryoconite		Proteobacteria	d__Bacteria	p__Proteobacteria	c__Alphaproteobacteria	o__Acetobacterales	f__Acetobacteraceae	g__CAITOL01	s__
cryoconite2_8	Cryoconite		Proteobacteria	d__Bacteria	p__Proteobacteria	c__Gammaproteobacteria	o__Burkholderiales	f__Burkholderiaceae	g__Schlegelella_A	s__
cryoconite3_1	Cryoconite		Proteobacteria	d__Bacteria	p__Proteobacteria	c__Gammaproteobacteria	o__Burkholderiales	f__Burkholderiaceae	g__Polaromonas	s__
cryoconite3_11	Cryoconite		Proteobacteria	d__Bacteria	p__Proteobacteria	c__Alphaproteobacteria	o__Acetobacterales	f__Acetobacteraceae	g__CAITOL01	s__
cryoconite3_16	Cryoconite		Proteobacteria	d__Bacteria	p__Proteobacteria	c__Alphaproteobacteria	o__Sphingomonadales	f__Sphingomonadaceae	g__CAHJWT01	s__
cryoconite3_2	Cryoconite		Proteobacteria	d__Bacteria	p__Proteobacteria	c__Gammaproteobacteria	o__Burkholderiales	f__Usitatibacteraceae	g__UKL13-2	s__
cryoconite3_20	Cryoconite		Proteobacteria	d__Bacteria	p__Proteobacteria	c__Gammaproteobacteria	o__Steroidobacterales	f__Steroidobacteraceae	g__Bog-1198	s__
cryoconite3_21	Cryoconite		Proteobacteria	d__Bacteria	p__Proteobacteria	c__Gammaproteobacteria	o__Burkholderiales	f__Burkholderiaceae	g__Ramlibacter	s__
cryoconite3_25	Cryoconite		Proteobacteria	d__Bacteria	p__Proteobacteria	c__Alphaproteobacteria	o__Caulobacterales	f__Caulobacteraceae	g__Palsa-881	s__
cryoconite3_26	Cryoconite		Proteobacteria	d__Bacteria	p__Proteobacteria	c__Gammaproteobacteria	o__Burkholderiales	f__Burkholderiaceae	g__Schlegelella_A	s__
cryoconite3_27	Cryoconite		Proteobacteria	d__Bacteria	p__Proteobacteria	c__Alphaproteobacteria	o__Sphingomonadales	f__Sphingomonadaceae	g__Novosphingobium	s__
cryoconite3_28	Cryoconite		Proteobacteria	d__Bacteria	p__Proteobacteria	c__Gammaproteobacteria	o__Burkholderiales	f__Burkholderiaceae	g__Schlegelella_A	s__
cryoconite3_4	Cryoconite		Proteobacteria	d__Bacteria	p__Proteobacteria	c__Alphaproteobacteria	o__Sphingomonadales	f__Sphingomonadaceae	g__Novosphingobium	s__
cryoconite3_7	Cryoconite		Proteobacteria	d__Bacteria	p__Proteobacteria	c__Gammaproteobacteria	o__Xanthomonadales	f__Rhodanobacteraceae	g__Dokdonella_A	s__
cryoconite3_9	Cryoconite		Proteobacteria	d__Bacteria	p__Proteobacteria	c__Gammaproteobacteria	o__Burkholderiales	f__Usitatibacteraceae	g__UKL13-2	s__
cryoconite1_10	Cryoconite		Proteobacteria	d__Bacteria	p__Proteobacteria	c__Gammaproteobacteria	o__Steroidobacterales	f__Steroidobacteraceae	g__Bog-1198	s__
cryoconite1_12	Cryoconite		Proteobacteria	d__Bacteria	p__Proteobacteria	c__Alphaproteobacteria	o__Sphingomonadales	f__Sphingomonadaceae	g__Novosphingobium	s__
cryoconite1_13	Cryoconite		Proteobacteria	d__Bacteria	p__Proteobacteria	c__Alphaproteobacteria	o__Acetobacterales	f__Acetobacteraceae	g__CAIQQQ01	s__
cryoconite1_16	Cryoconite		Proteobacteria	d__Bacteria	p__Proteobacteria	c__Alphaproteobacteria	o__Sphingomonadales	f__Sphingomonadaceae	g__CAHJWT01	s__
cryoconite1_17	Cryoconite		Proteobacteria	d__Bacteria	p__Proteobacteria	c__Alphaproteobacteria	o__Sphingomonadales	f__Sphingomonadaceae	g__Novosphingobium	s__
cryoconite1_18	Cryoconite		Proteobacteria	d__Bacteria	p__Proteobacteria	c__Gammaproteobacteria	o__Burkholderiales	f__UKL13-2	g__	s__
cryoconite1_2	Cryoconite		Proteobacteria	d__Bacteria	p__Proteobacteria	c__Gammaproteobacteria	o__Burkholderiales	f__Burkholderiaceae	g__Rhizobacter	s__
cryoconite1_22	Cryoconite		Proteobacteria	d__Bacteria	p__Proteobacteria	c__Gammaproteobacteria	o__Xanthomonadales	f__Rhodanobacteraceae	g__Dokdonella_A	s__
cryoconite1_23	Cryoconite		Proteobacteria	d__Bacteria	p__Proteobacteria	c__Gammaproteobacteria	o__Burkholderiales	f__Burkholderiaceae	g__Ramlibacter	s__
cryoconite1_24	Cryoconite		Proteobacteria	d__Bacteria	p__Proteobacteria	c__Gammaproteobacteria	o__Burkholderiales	f__Burkholderiaceae	g__Polaromonas	s__
cryoconite1_26	Cryoconite		Proteobacteria	d__Bacteria	p__Proteobacteria	c__Gammaproteobacteria	o__Burkholderiales	f__Burkholderiaceae	g__Rhizobacter	s__
cryoconite1_27	Cryoconite		Proteobacteria	d__Bacteria	p__Proteobacteria	c__Alphaproteobacteria	o__Sphingomonadales	f__Sphingomonadaceae	g__UBA1936	s__
cryoconite1_29	Cryoconite		Proteobacteria	d__Bacteria	p__Proteobacteria	c__Alphaproteobacteria	o__Caulobacterales	f__Caulobacteraceae	g__Palsa-881	s__
cryoconite1_4	Cryoconite		Proteobacteria	d__Bacteria	p__Proteobacteria	c__Gammaproteobacteria	o__Burkholderiales	f__UKL13-2	g__	s__
filter2_1	Ice		Proteobacteria	d__Bacteria	p__Proteobacteria	c__Alphaproteobacteria	o__Sphingomonadales	f__Sphingomonadaceae	g__CAHJWT01	s__
filter2_6	Ice		Proteobacteria	d__Bacteria	p__Proteobacteria	c__Gammaproteobacteria	o__Xanthomonadales	f__Rhodanobacteraceae	g__Rhodanobacter	s__
filter2_7	Ice		Proteobacteria	d__Bacteria	p__Proteobacteria	c__Gammaproteobacteria	o__Burkholderiales	f__Burkholderiaceae	g__CAIMXF01	s__
filter1_10	Ice		Proteobacteria	d__Bacteria	p__Proteobacteria	c__Gammaproteobacteria	o__Burkholderiales	f__Burkholderiaceae	g__CAIMXF01	s__
filter1_12	Ice		Proteobacteria	d__Bacteria	p__Proteobacteria	c__Gammaproteobacteria	o__Burkholderiales	f__Burkholderiaceae	g__Undibacterium	s__Undibacterium sp014376575
filter1_3	Ice		Proteobacteria	d__Bacteria	p__Proteobacteria	c__Alphaproteobacteria	o__Sphingomonadales	f__Sphingomonadaceae	g__CAHJWT01	s__
filter1_8	Ice		Proteobacteria	d__Bacteria	p__Proteobacteria	c__Alphaproteobacteria	o__Sphingomonadales	f__Sphingomonadaceae	g__Novosphingobium	s__
filter1_9	Ice		Proteobacteria	d__Bacteria	p__Proteobacteria	c__Gammaproteobacteria	o__Xanthomonadales	f__Rhodanobacteraceae	g__Rhodanobacter	s__
filter3_12	Ice		Proteobacteria	d__Bacteria	p__Proteobacteria	c__Gammaproteobacteria	o__Xanthomonadales	f__Rhodanobacteraceae	g__Rhodanobacter	s__
filter3_2	Ice		Proteobacteria	d__Bacteria	p__Proteobacteria	c__Gammaproteobacteria	o__Burkholderiales	f__Burkholderiaceae	g__Undibacterium	s__Undibacterium sp014376575
filter3_4	Ice		Proteobacteria	d__Bacteria	p__Proteobacteria	c__Alphaproteobacteria	o__Sphingomonadales	f__Sphingomonadaceae	g__Novosphingobium	s__
filter3_7	Ice		Proteobacteria	d__Bacteria	p__Proteobacteria	c__Gammaproteobacteria	o__Burkholderiales	f__Burkholderiaceae	g__CAIMXF01	s__
filter3_9	Ice		Proteobacteria	d__Bacteria	p__Proteobacteria	c__Alphaproteobacteria	o__Sphingomonadales	f__Sphingomonadaceae	g__	s__
biofilm2_1	Biofilm		Proteobacteria	d__Bacteria	p__Proteobacteria	c__Gammaproteobacteria	o__Burkholderiales	f__Methylophilaceae	g__Methylotenera	s__
biofilm2_12	Biofilm	Sphingomonas psychrolutea	Proteobacteria	d__Bacteria	p__Proteobacteria	c__Alphaproteobacteria	o__Sphingomonadales	f__Sphingomonadaceae	g__Sphingomonas	s__Sphingomonas psychrolutea
biofilm2_2	Biofilm		Proteobacteria	d__Bacteria	p__Proteobacteria	c__Gammaproteobacteria	o__Burkholderiales	f__Burkholderiaceae	g__Polaromonas	s__
biofilm2_3	Biofilm		Proteobacteria	d__Bacteria	p__Proteobacteria	c__Gammaproteobacteria	o__Burkholderiales	f__Burkholderiaceae	g__Rhodoferax	s__
biofilm2_4	Biofilm		Proteobacteria	d__Bacteria	p__Proteobacteria	c__Alphaproteobacteria	o__Acetobacterales	f__Acetobacteraceae	g__PALSA-911	s__
biofilm2_7	Biofilm		Proteobacteria	d__Bacteria	p__Proteobacteria	c__Alphaproteobacteria	o__Acetobacterales	f__Acetobacteraceae	g__CAIQQQ01	s__
biofilm2_8	Biofilm		Proteobacteria	d__Bacteria	p__Proteobacteria	c__Gammaproteobacteria	o__Burkholderiales	f__Burkholderiaceae	g__Paucibacter_A	s__
cryoconite2_1	Cryoconite		Verrucomicrobia	d__Bacteria	p__Verrucomicrobiota	c__Verrucomicrobiae	o__Chthoniobacterales	f__UBA10450	g__SZAS-18	s__
cryoconite3_5	Cryoconite		Verrucomicrobia	d__Bacteria	p__Verrucomicrobiota	c__Verrucomicrobiae	o__Chthoniobacterales	f__UBA10450	g__SZAS-18	s__
cryoconite1_25	Cryoconite		Verrucomicrobia	d__Bacteria	p__Verrucomicrobiota	c__Verrucomicrobiae	o__Chthoniobacterales	f__UBA10450	g__	s__
